# Supplementary material
Source: MDPI journal article supplement (https://www.mdpi.com/2076-3263/11/7/288)
Supplement: s1 [file s1]

**Figure S1.** Coordinates of the selected samples from both areas.

| <b>Kastos Island</b>    | <b>X</b>   | <b>Y</b>   |
|-------------------------|------------|------------|
| Sarakiniko bay          | 38.563064° | 20.902603° |
|                         | 38.563956° | 20.903060° |
|                         | 38.564017° | 20.903877° |
|                         | 38.564448° | 20.904515° |
|                         | 38.566342° | 20.905491° |
|                         | 38.566923° | 20.906250° |
|                         | 38.568263° | 20.906984° |
|                         | 38.569618° | 20.907756° |
| South part              | 38.54327°  | 20.901394° |
|                         | 38.545208° | 20.901759° |
| Central part            | 38.577313° | 20.911366° |
|                         | 38.575232° | 20.912474° |
|                         | 38.574299° | 20.91388°  |
|                         | 38.573351° | 20.914413° |
|                         | 38.572389° | 20.915614° |
|                         | 38.572311° | 20.91697°  |
|                         | 38.573685° | 20.917665° |
| West part               | 38.577441° | 20.915322° |
|                         | 38.578650° | 20.916026° |
|                         | 38.579897° | 20.915942° |
|                         | 38.581797° | 20.917215° |
|                         | 38.585404° | 20.920530° |
|                         | 38.589851° | 20.922913° |
|                         | 38.595605° | 20.927464° |
| North part              | 38.599198° | 20.938014° |
|                         | 38.599700° | 20.938121° |
|                         | 38.601478° | 20.937626° |
|                         | 38.602462° | 20.938597° |
|                         | 38.603559° | 20.938979° |
|                         | 38.604043° | 20.938618° |
|                         | 38.604629° | 20.937416° |
|                         | 38.604497° | 20.936061° |
|                         | 38.604534° | 20.935729° |
|                         | 38.604513° | 20.935312° |
| <b>Araxos Peninsula</b> | <b>X</b>   | <b>Y</b>   |
| Gianiskari coast        | 38.174093  | 21.366957  |
| On the road             | 38.183412  | 21.397246  |
| Old Quarry              | 38.171921  | 21.401142  |
| New Quarry              | 38.167718  | 21.391686  |
